# Supplementary material
Source: bioRxiv or medRxiv preprint supplement (https://www.biorxiv.org/content/biorxiv/early/2020/11/20/2020.11.18.388199.1/DC1/embed/media-1.pdf)

**Fig. S1** (a-d) The O<sub>2</sub> consumption rates, Respiratory Quotient and food intake in 8-w-old WT and KO mice fed chow diet at 22°C measured by CLAMS system (n = 5 for each group). (e-f) Representative optical microscopy images of H&E staining iWAT, eWAT and Liver from WT and KO mice fed chow diet at 22°C (Scale bar 200 μm). (g) Immunoblotting measurement of TOMM20 in different mice tissues (n = 3), α-TUBULIN was used as a loading control. (h-i) The O<sub>2</sub> consumption rates, respiratory quotient and food intake in 30 w HFD-induced WT and KO mice at 22°C measured by CLAMS system (n = 5 for each group). Data were mean ± SEM and each dot showed as one replicate. \*P < 0.05, \*\*P < 0.01, \*\*\*P < 0.001, Unpaired two-tailed Student's t-tests was used in two sets of data.

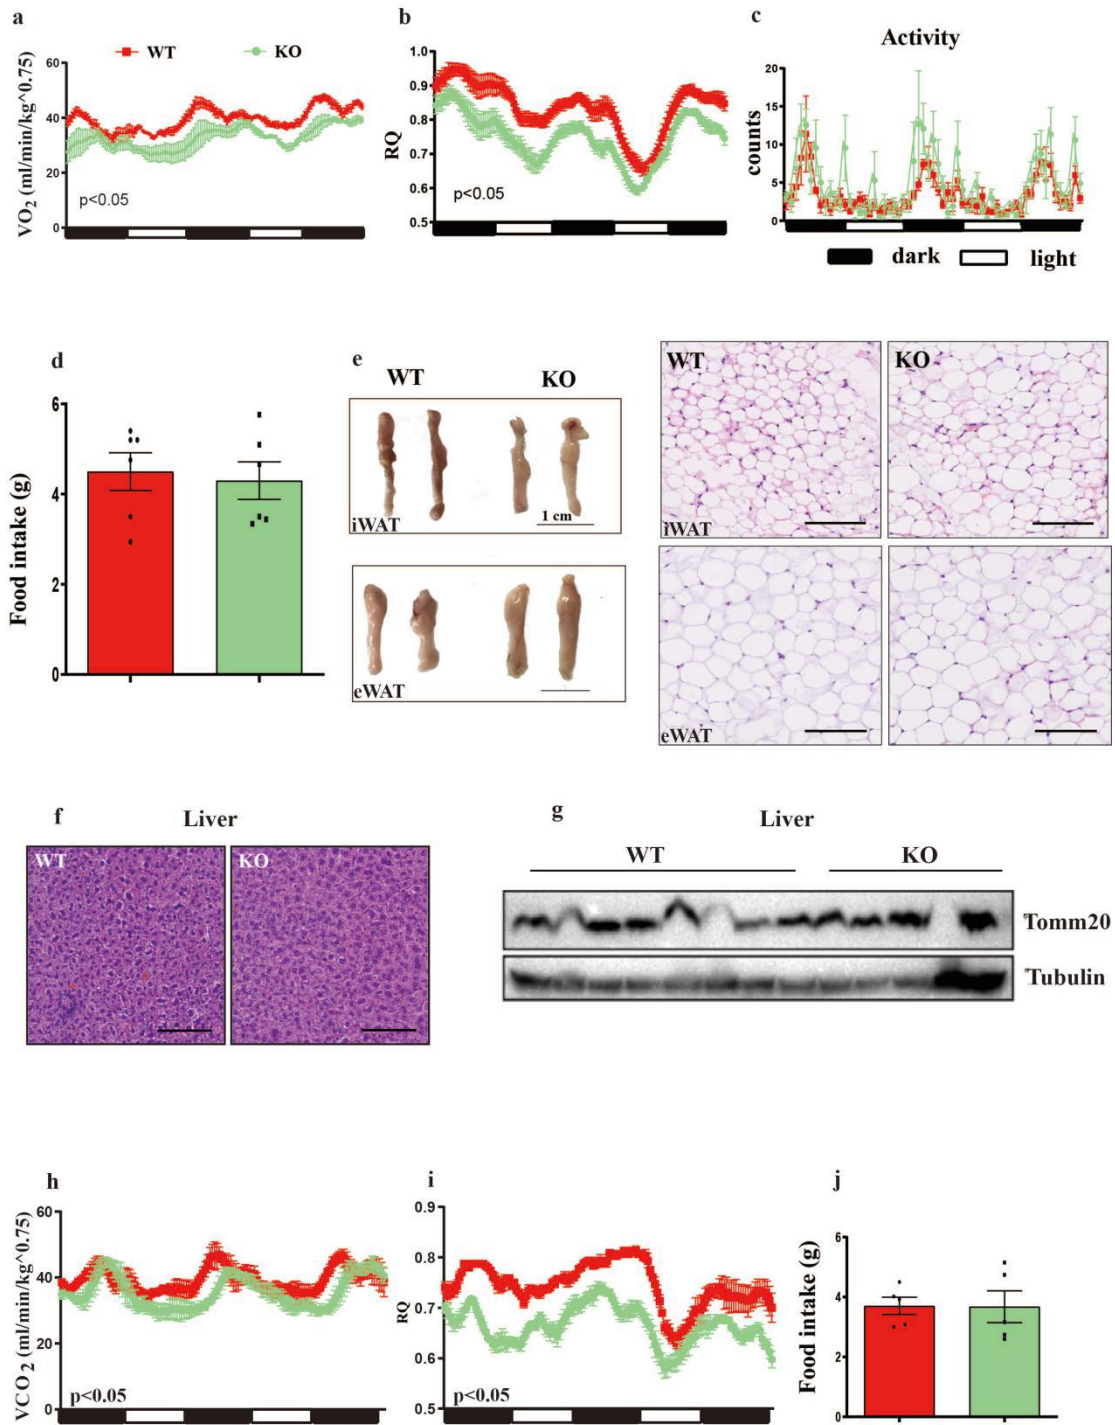

Supplement: Supplementary file [file media-1.pdf]
